# Supplementary material
Source: HighWire-hosted journal article supplement (https://jnnp.bmj.com/content/95/10/919)
Supplement: inline-supplementary-material-1 [file inline-supplementary-material-1.pdf]

**Supplementary material for the following manuscript:****Title**

The Epidemiology of Myasthenia Gravis in Denmark, Finland, and Sweden: A Population-Based Observational Study

**Authors**

John Vissing<sup>1</sup>, Sari Atula<sup>2</sup>, Mari Savolainen<sup>3</sup>, Juha Mehtälä<sup>4</sup>, Laila Mehkri<sup>5</sup>, Tina Bech Olesen<sup>5</sup>, Tero Ylisaukko-oja<sup>4,5</sup>, Ingrid Lindberg-Schager<sup>6</sup>, Fredrik Berggren<sup>7</sup>, Fredrik Piehl<sup>8,9</sup>

**Affiliations**

<sup>1</sup>Copenhagen Neuromuscular Center, Department of Neurology, Rigshospitalet, University of Copenhagen, Copenhagen, Denmark;

<sup>2</sup>Clinical Neurosciences, Neurology, University of Helsinki and Helsinki University Hospital, Helsinki, Finland;

<sup>3</sup>UCB Pharma, Espoo, Finland;

<sup>4</sup>MedEngine Oy, Helsinki, Finland;

<sup>5</sup>MedEngine DK ApS, Copenhagen, Denmark;

<sup>6</sup>UCB Pharma, Stockholm, Sweden;

<sup>7</sup>UCB Pharma, Copenhagen, Denmark;

<sup>8</sup>Department of Clinical Neuroscience, Karolinska Institutet, Stockholm, Sweden;

<sup>9</sup>Department of Neurology, Karolinska University Hospital, Stockholm, Sweden

**SUPPLEMENTARY FIGURES****Supplementary Figure 1. Flow-chart of the study population.**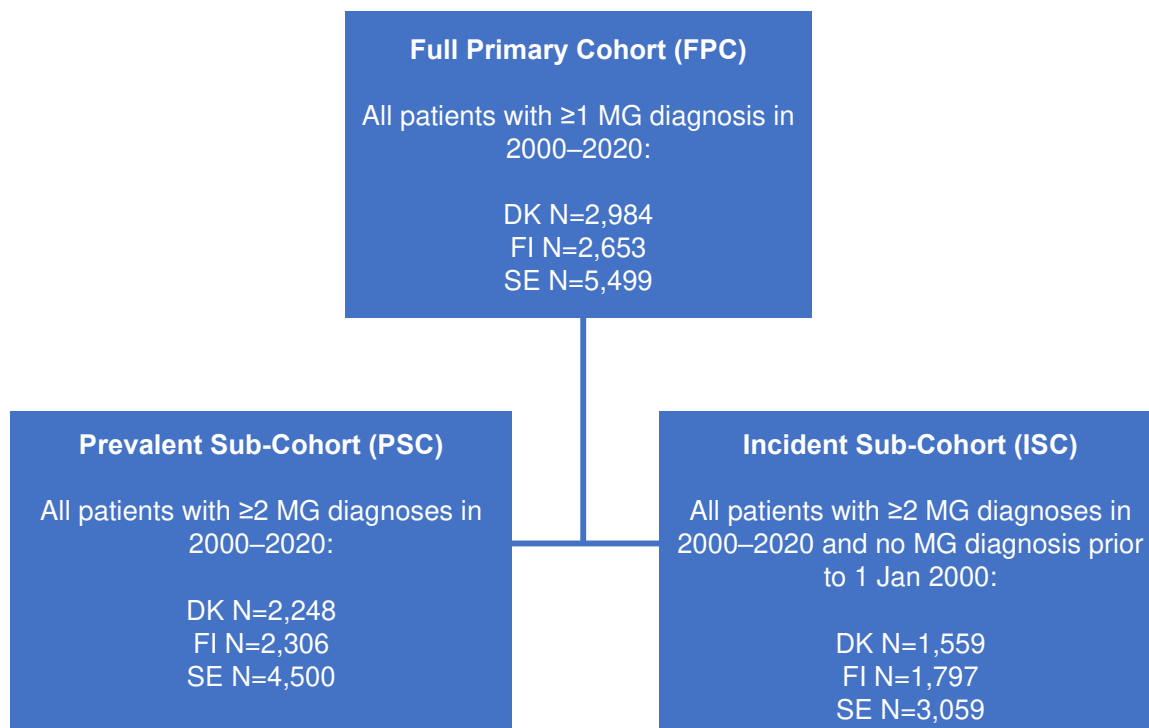

FPC, Full primary cohort; PSC, Prevalent Sub-Cohort; ISC, Incident Sub-Cohort; DK, Denmark; FI, Finland; SE, Sweden.

\* A minimum of 12 months without an MG diagnosis before the date of diagnosis was required for a patient to be included in the incident cohort (prior MG diagnosis was screened from all available registry data).

**Supplementary Figure 2. Incidence of myasthenia gravis per 100,000 in the Incident Sub-Cohort in Denmark, Finland, and Sweden in year 2000–2020, as stratified by age and sex.**

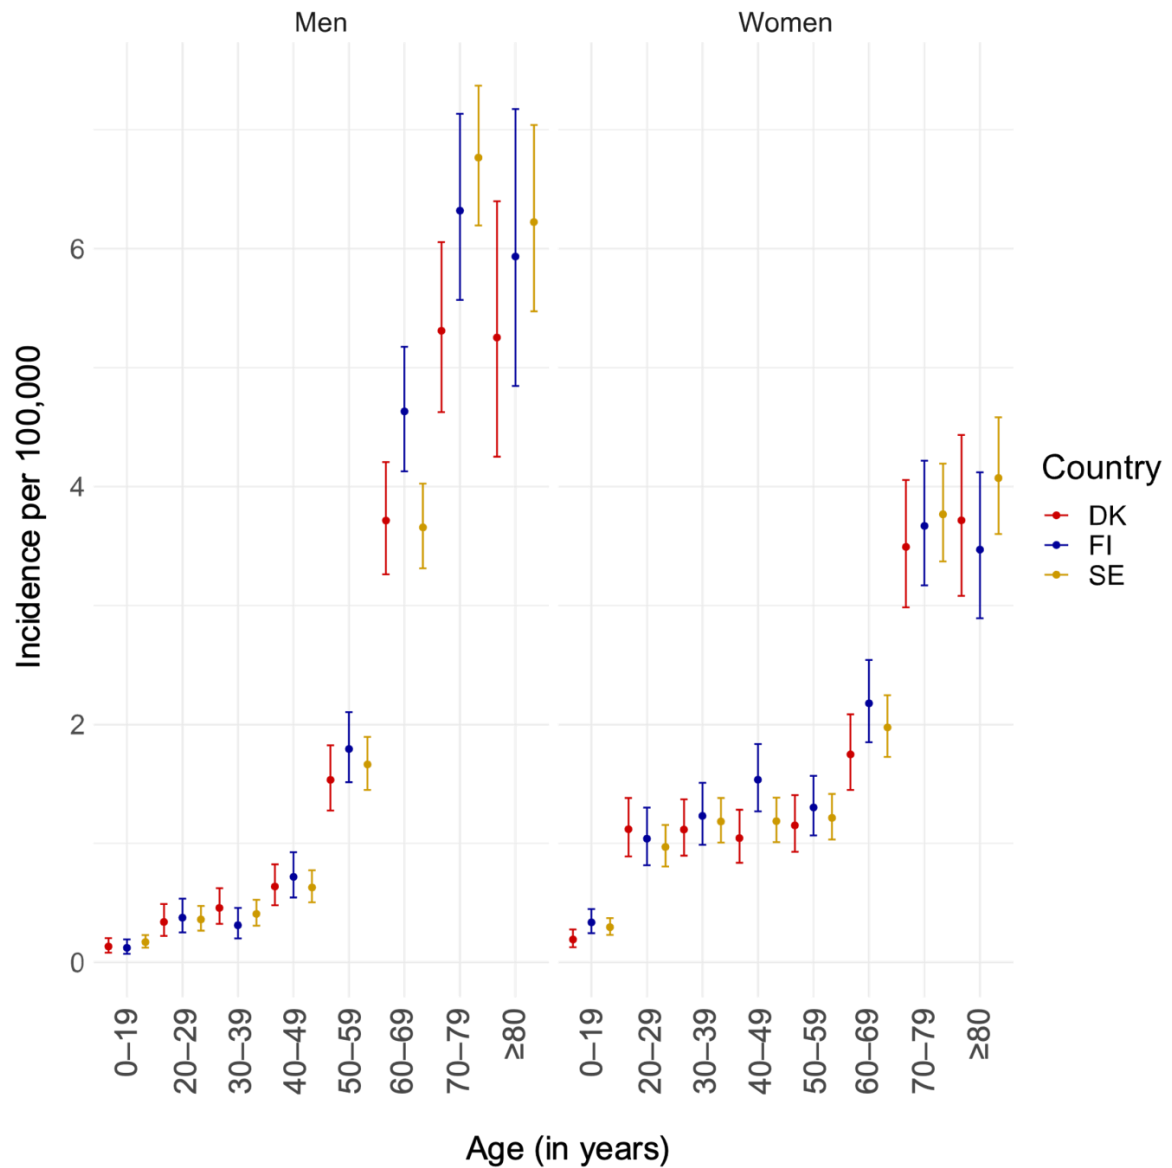

DK, Denmark; FI, Finland; SE, Sweden.

**Supplementary Figure 3. Prevalence of myasthenia gravis in the Prevalent Sub-Cohort in Denmark, Finland, and Sweden in year 2000–2020, as stratified by age and sex.**

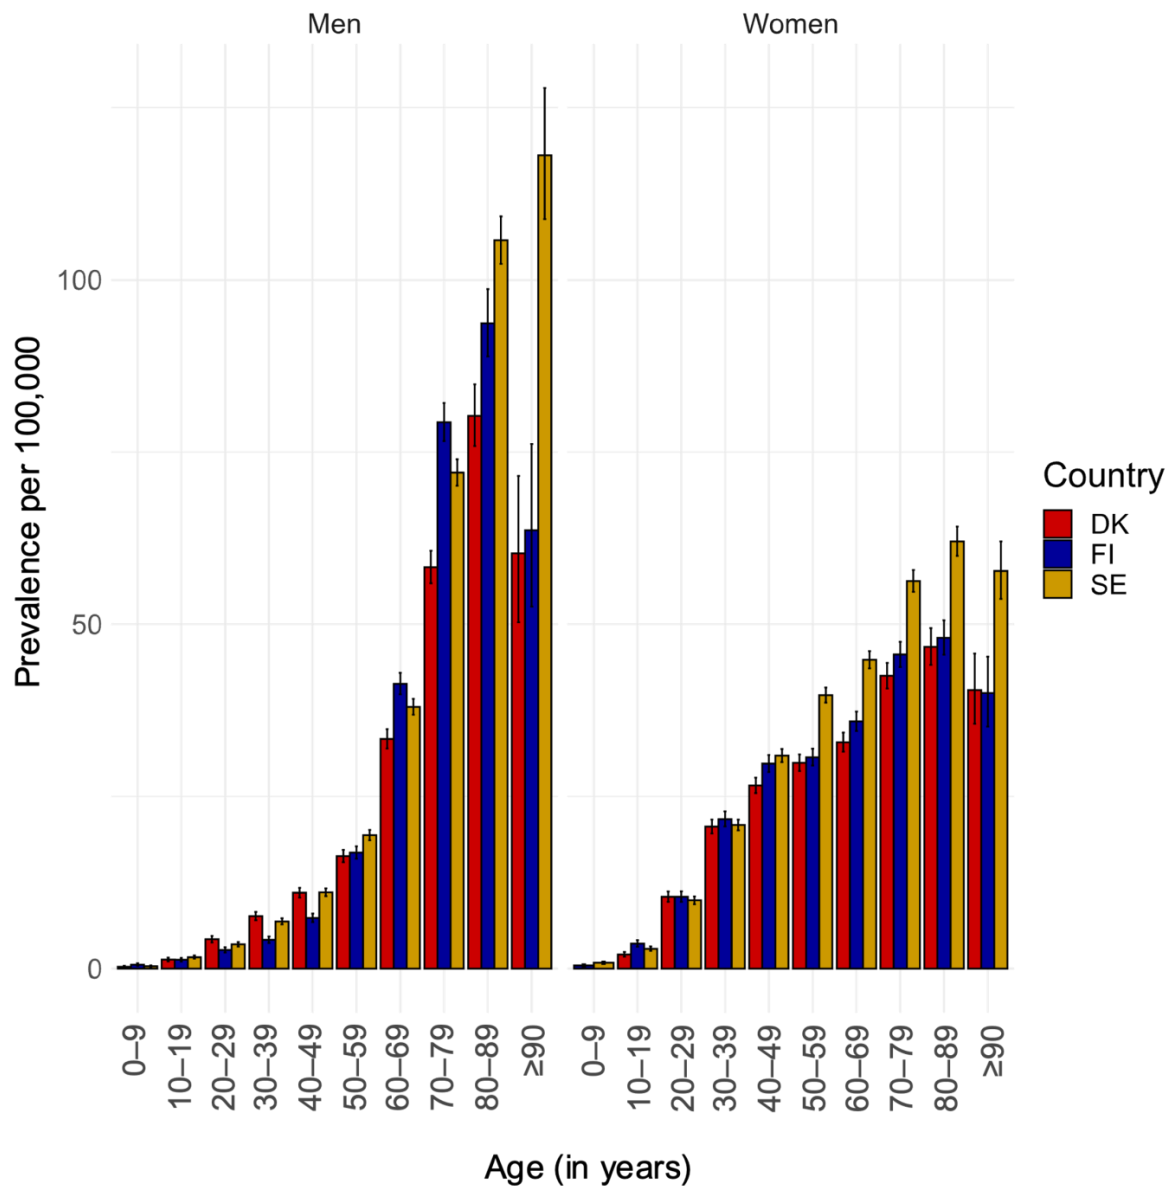

DK, Denmark; FI, Finland; SE, Sweden.

**Supplementary Figure 4. Standardised mortality ratio of myasthenia gravis in the Prevalent Sub-Cohort in Denmark, Finland, and Sweden in 2000–2020 compared to the background population, as stratified by age and sex.**

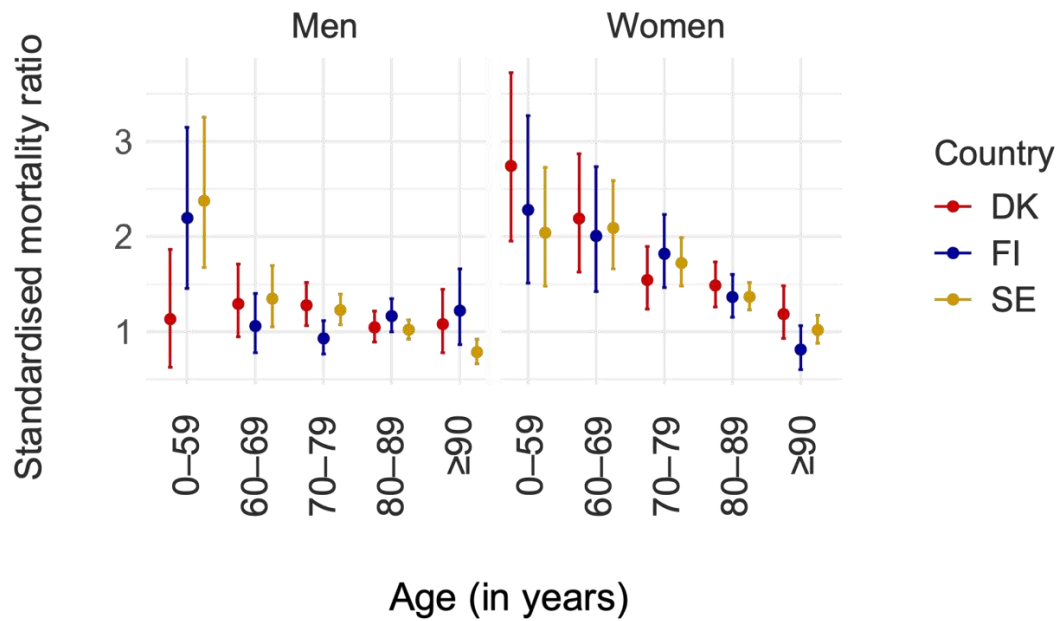

DK, Denmark; FI, Finland; SE, Sweden.
